# Supplementary material for: The GhTT2_A07 gene is linked to the brown colour and natural flame retardancy phenotypes of Lc1 cotton (Gossypium hirsutum L.) fibres
Source: PubMed Central journal article supplement (PMC5049394; doi:10.1093/jxb/erw312), 2016-08-27
Supplement: supp_erw312_Supplementary_Tables_S1_S3_S5.pdf [file supp_erw312_Supplementary_Tables_S1_S3_S5.pdf]

**Table S1.** Inversion-specific marker scheme and amplification results. Primer sequences are provided in Table S2.

| Cotton Lines | SNP Primer Combinations |           |           |           |
|--------------|-------------------------|-----------|-----------|-----------|
|              | CCU0002_F               | CCU0009_F | CCU0002_F | CCU0002_R |
|              | CCU0002_R               | CCU0009_R | CCU0009_F | CCU0009_R |
| MC-BL        | -                       | -         | +         | +         |
| MC-WL        | +                       | +         | -         | -         |
| PD-3         | +                       | +         | -         | -         |
| PD930002     | -                       | -         | +         | +         |
| Heterozygote | +                       | +         | +         | +         |

**Table S2.** SNP genetic markers used to map the 1.4 Mb genomic inversion in *Lc1* cotton lines.

| Primer    | Primer Sequence            |                              |
|-----------|----------------------------|------------------------------|
|           | Forward                    | Reverse                      |
| CCU0001   | TGAAAGGCGGTTCTTTAGT        | ATGTCCGAGATTGATTTAGATATG     |
| CCU0002   | CATTGGAGAATAAAGTCTCATGCT   | TTCCAACATTATTTACCGGAATGG     |
| CCU0003   | ATTGGTCGCTCTTCCTGAT        | ATATCCTCTGTAGAGGTATCT        |
| CCU0004   | TGCCGGTGACTTTCATG          | CATGCATTTGTGTCATGCTCT        |
| CCU0005   | AAGCACTTTCCTGGATAGCA       | GAAGATGAACCTATTCTTGACAG      |
| CCU0006   | CGTAAACTTTTACAATCCGAATTGTT | AAACTTGTTTGGCTTTAAAAGAGG     |
| CCU0007   | AGGGACAACATGTGGATAATAG     | CTGTCTTTATTCTTGAGACAGATAGCAA |
| CCU0008   | AATCATTCTCGAGCTCAATCA      | GAAGAAAGAGAACGTACCTTTTGA     |
| CCU0009   | CATCCATACTAAGATCAATGGCG    | CATATCAGCAAGAGCACACC         |
| CCU0010w* | CTTGACACTGATGAATAGC        | AGTAATTTTCTCATAACATGTAA      |
| CCU0010b* | CTTGACACTGATGAATAGA        | AGTAATTTTCTCATAACATGTAA      |
| CCU0011   | CTTGAATATCAAATGGGTTTGCA    | CTGAATTTTCTTTGTTTTGTCATT     |

\* w and b indicates primer pair specific for white wild-type fibres and *Lc1* fibres, respectively.

**Table S3.** Nucleotide sequences of primer pairs utilized for RT-qPCR, gene annotations, and database accession numbers. Gene product abbreviations can be found in Table S5.

| Gene        | Primer Sequence (5' - 3') |                         | Gene Accessions |                              |
|-------------|---------------------------|-------------------------|-----------------|------------------------------|
|             | Forward                   | Reverse                 | TAIR            | TM-1*                        |
| PAL         | TGAAATCGCAATGGCCTCCT      | TGCTTCGGCTGTTTTTCGTG    | AT2G37040.1     | Gh_A01G1839; Gh_D01G2080     |
| MYB3        | AACAAGCCACGAACACGAGA      | CGAAGGGTTTCCTCCTGCTT    | AT1G22640.1     | Gh_A08G0299; Gh_D08G0391     |
| MYB4        | ATGAGGAAGCCTTGTTGCGA      | GCAACCAGCTTCACCGTTTT    | AT4G38620.1     | Gh_a01G1265; Gh_D01G1482     |
| DFR (TT3)   | CCACCATTGTTGAGCTTGCC      | TCTCCACAGCTCCGACAAAC    | AT5G42800.1     | Gh_A06G0066; Gh_D06G0041     |
| DFR (TT3)   | GACCCTGCAGACAACCTCGAA     | GGACTCGAAGTCCATAGGCG    | AT5G42800.1     | Gh_A05G1647; Gh_D05G1836     |
| ANS (TT18)  | GTCGAAGCTCACACCGATATAA    | ACCCACTTGCCTTGGTAAA     | AT4G22880.1     | Gh_A08G1593; Gh_D08G1902     |
| ANR (BAN)   | TCCAAGACGTTGGCTGAAA       | GAAGGACCAGTCATGAGAGAAG  | AT1G61720.1     | Gh_A05G1424; Gh_D05G1596     |
| LAR         | GAGCAAGATTAGGAGGCAGATAG   | TGGATGAGTGTGTCATGGTAG   | AT1G75290.1     | Gh_A12G2406; Gh_D12G2642     |
| MATE (TT12) | TTATGTTGGGCATGGCGAGT      | CTTGAAGGACGGTGTCCGAA    | AT3G59030.1     | Gh_A09G0073; Gh_Sca011468G01 |
| MATE (TT12) | AGTAGCGGGAATTTGGTGGG      | AAGAGGCGACAGATGTTGGG    | AT3G59030.1     | Gh_A12G0812; Gh_D12G0830     |
| TT2         | ATTGTACAGTGATGGCGGCT      | ATTGCCTCACCCAACGGAAA    | AT5G35550.1     | Gh_A07G2341; Gh_D07G0169     |
| TTG1        | ACGCTAACAGAGTCCACATAATC   | AAGTTTGGTGGGTGGGTAAG    | AT5G24520.1     | Gh_A08G0926; Gh_D08G1130     |
| GhUCP E2    | CGGAAAGAGGTGAAGATGTCAAC   | GGATCTTGCTGCAACCTCTTAAA | AT2G02760.1     | Gh_A12G1527; Gh_D12G1650     |
| GhTubA4     | GATCTCGCTGCCCTGGAA        | ACCAGACTCAGCGCCTCACTT   | AT1G50010.1     | Gh_A05G3784; Gh_D05G2068     |
| 18S         | CGTCCCTGCCCTTTGTACA       | AACACTTCACCGGACCATTCA   | AT3G41768.1     | na                           |

\* The *G. hirsutum* TM-1 subgenome gene accessions are from the assembly of Zhang *et al.*, 2015. Full sequence information is available at [www.cottongen.org](http://www.cottongen.org).

**Table S5.** List of enzyme abbreviations used in Fig. 5 and Supplementary Figs S3 and S4.

|                                        | Enzyme Abbreviation        | Enzyme Name                                                                |
|----------------------------------------|----------------------------|----------------------------------------------------------------------------|
| Shikimate Pathway                      | DAHPS                      | 3-Deoxy-wrabinheptulosonate 7-phosphate synthase                           |
|                                        | DHQS                       | 3-Dehydroquininate synthase                                                |
|                                        | DHQ                        | 3-Dehydroquininate dehydratase/shikimate dehydrogenase                     |
|                                        | SDH                        | shikimate dehydrogenase                                                    |
|                                        | SK                         | Shikimate kinase                                                           |
|                                        | EPSPS                      | 5-Enolpyruvylshikimate 3-phosphate (EPSP) synthase                         |
|                                        | CS                         | Chorismate synthase                                                        |
| Phenylalanine Pathway                  | CM                         | Chorismate mutase                                                          |
|                                        | PAT                        | Prephenate aminotransferase                                                |
|                                        | ADT                        | Arogenate dehydratase                                                      |
| Phenylpropanoid and flavonoid pathways | PAL                        | Phenylalanine ammonia lyase                                                |
|                                        | C4H                        | Cinnamate 4-hydroxylase                                                    |
|                                        | 4CL3, 2, 1                 | 4-Coumarate-CoA ligase 3, 2, and 1                                         |
|                                        | CHS                        | Chalcone synthase                                                          |
|                                        | ACC                        | Acetyl-CoA carboxylase                                                     |
|                                        | CHI                        | Chalcone isomerase                                                         |
|                                        | F3H                        | Flavonol 3-hydroxylase                                                     |
|                                        | FLS                        | Flavonol synthase                                                          |
|                                        | F3'H                       | Flavonoid 3'-hydroxylase                                                   |
|                                        | DFR                        | Dihydrokaempferol 4-reductase                                              |
|                                        | ANS/LDOX/TT18              | Anthocyanidin synthase/Leucoanthocyanidin dioxygenase/TRANSPARENT TESTA 18 |
|                                        | ANR/BAN                    | Anthocyanidin reductase/BANYULS                                            |
|                                        | LAR                        | Leucoanthocyanidin reductase                                               |
|                                        | FGT                        | Flavonol 3-O-glucosyltransferase                                           |
|                                        | MATE/TT12                  | Multi-drug and toxic efflux transporter/TRANSPARENT TESTA 12               |
|                                        | AHA10/TT13                 | AUTOINHIBITED H(+)-ATPASE ISOFORM 10/TRANSPARENT TESTA 13                  |
|                                        | LAC15/TT10                 | Laccase 15/TRANSPARENT TESTA 10                                            |
|                                        | TT2 and TT8                | TRANSPARENT TESTA 2 and 8                                                  |
| TTG1                                   | TRANSPARENT TESTA GLABRA 1 |                                                                            |
